# Supplementary material
Source: Springer Nature journal article supplement (https://www.springermedizin.de/resource/supplementary/13058_2010_9463_MOESM2_ESM.PDF/9702214)
Supplement: MOESM2 [file 9702214]

**Supplementary Table 2. Identified breast cancer associated variants in affected 71 individuals.**

| Gene/<br>Exon/Intron/UTR | Nucleotide change <sup>a</sup> | Effect on protein     | rs Number <sup>b</sup> | Carrier Frequency                                                         |                                                                           | P-values     | OR;95%CI                | Status                   |
|--------------------------|--------------------------------|-----------------------|------------------------|---------------------------------------------------------------------------|---------------------------------------------------------------------------|--------------|-------------------------|--------------------------|
| <b><i>BRCA1</i></b>      |                                |                       |                        |                                                                           |                                                                           |              |                         |                          |
| Exon 18                  | 5095C>T                        | Arg1699Trp            | rs55770810             | <b>0.014 (1/71)</b><br>TT 0 (0/71)<br>CT 0.014 (1/71)<br>CC 0.986 (70/71) | na                                                                        | -            | -                       | Reported <sup>c, d</sup> |
| <b><i>CHEK2</i></b>      |                                |                       |                        |                                                                           |                                                                           |              |                         |                          |
| Exon 3                   | 470T>C                         | Ile157Thr             | -                      | <b>0.071 (5/70)</b><br>CC 0 (0/70)<br>TC 0.071 (5/70)<br>TT 0.929 (65/70) | 0.055 (21/381)<br>CC 0 (0/381)<br>TC 0.055 (21/381)<br>TT 0.945 (360/381) | <b>0.578</b> | <b>1.32; 0.48-3.62</b>  | Reported <sup>e</sup>    |
| Exon 10                  | 1100delC <sup>f</sup>          | Fs, stop at codon 381 | -                      | <b>0.042(3/71)</b>                                                        | 0.016 (6/380)                                                             | <b>0.155</b> | <b>2.75; 0.67-11.26</b> | Reported <sup>e</sup>    |

CI: confidence interval, Fs: frameshift, na: not analyzed, OR:odds ratio. <sup>a</sup>The reference sequences were obtained from the UCSC Genome Browser [44] and the accession numbers were following: *BRCA1*: [UCSC Genome Browser:NM\_007295.2] and *CHEK2*: [UCSC Genome Browser:NM\_007194.3]. The accession numbers for the protein sequences obtained from the Swiss-Prot Protein knowledgebase [45] were following: *BRCA1*: [Swiss-Prot:P38398] and *CHEK2*: [Swiss-Prot:O96017], <sup>b</sup>The RefSNP number, obtained from the NCBI Single Nucleotide Polymorphism database (dbSNP) [46]. <sup>c</sup>The NCBI dbSNP [46]. <sup>d</sup>The Breast Cancer Information Core database [47]. <sup>e</sup>Reported in the Finnish population by Vahteristo et al.[11]. <sup>f</sup>Heterozygous deletion or insertion.
